# Supplementary material for: Encapsulation of echinomycin in cyclodextrin inclusion complexes into liposomes: in vitro anti-proliferative and anti-invasive activity in glioblastoma
Source: Royal Society of Chemistry journal article supplement (doi:10.1039/c9ra05636j), 2019-01-01
Supplement: c9ra05636j1.pdf [file c9ra05636j1.pdf]

## Supplementary

### Encapsulation of echinomycin in cyclodextrin inclusion complexes into liposomes: *in vitro* anti-proliferative and anti-invasive activity in glioblastoma

Walhan Alshaer<sup>1,\*,#</sup>, Manar Zraikat<sup>2,#</sup>, Amer Amer<sup>3</sup>, Hamdi Nsairat<sup>4</sup>, Zainab Lafi<sup>3</sup>, Dana A. Alqudah<sup>1</sup>, Enas Alqadi<sup>2</sup>, Tasneem Alsheleh<sup>2</sup>, Fadwa Odeh<sup>4</sup>, Arwa Alkaraki<sup>1,2</sup>, Malek Zihlif<sup>2</sup>, Yasser Bustanji<sup>3,5</sup>, Abdalla Awidi<sup>1,6,\*</sup>

<sup>1</sup>Cell Therapy Center, The University of Jordan, Amman, Jordan.

<sup>2</sup>Department of Pharmacology, Faculty of Medicine, The University of Jordan, Amman, Jordan.

<sup>3</sup>Department of Clinical Pharmacy, Faculty of Pharmacy, The University of Jordan, Amman, Jordan.

<sup>4</sup>Department of Chemistry, Faculty of Science, The University of Jordan, Amman, Jordan.

<sup>5</sup>HMCSR, The University of Jordan, Amman, Jordan.

<sup>6</sup>Department of Hematology, Jordan University Hospital, The University of Jordan, Amman, Jordan.

# These authors contributed equally to this work.

#### \*Corresponding Authors:

##### **Dr. Walhan Alshaer**

Cell Therapy Center  
The University of Jordan  
PO Box: 5825, Amman, Jordan.  
Office: (+962) 6-5355000 Ext: 23960  
Mobile: +(962) 790823678  
E-mail: [walhan.alshaer@ju.edu.jo](mailto:walhan.alshaer@ju.edu.jo)

##### **Professor Abdalla Awidi**

Cell Therapy Center  
The University of Jordan  
PO Box: 5825, Amman, Jordan.  
Office: (+962) 6-5355000 Ext: 23960  
Mobile: (+962) 790823678  
E-mail: [abdalla.awidi@gmail.com](mailto:abdalla.awidi@gmail.com)

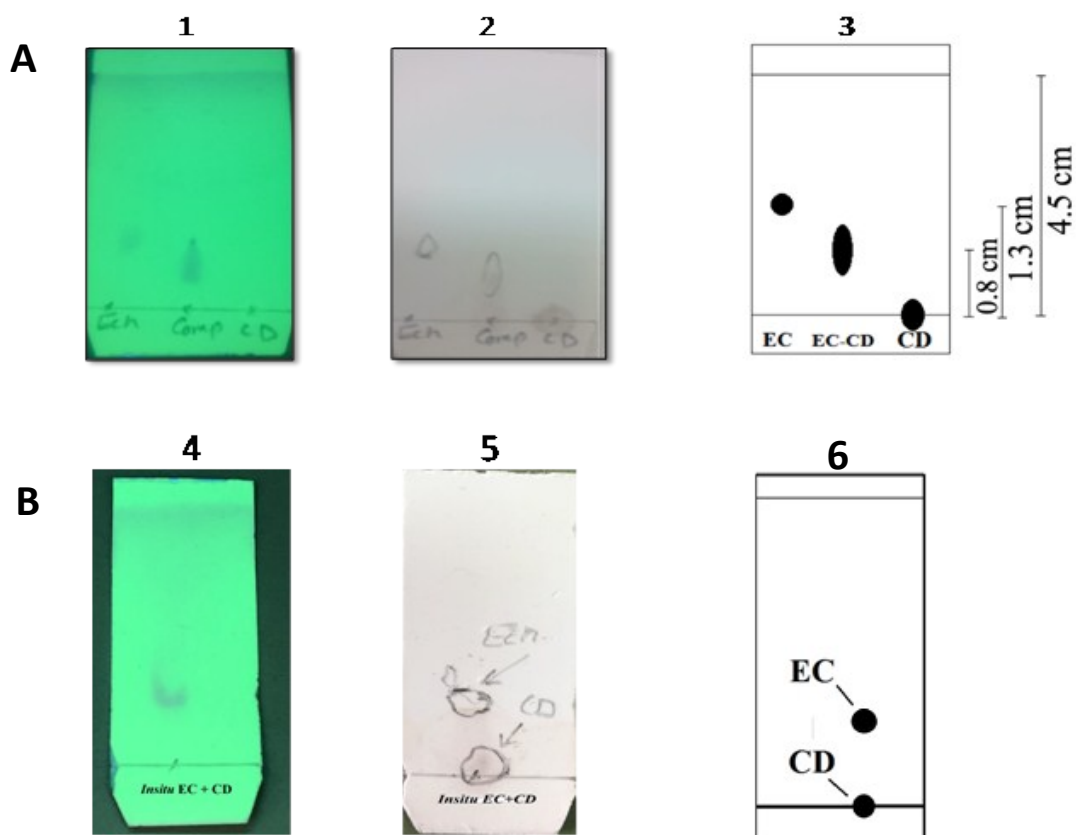

**Fig. S1:** Thin Layer Chromatography (TLC) of Echinomycin,  $\gamma$ CD, Echinomycin-in- $\gamma$ CD and "in situ" Echinomycin- $\gamma$ CD mixture. (1) Spots under UV light. (2) Spots after heating silica plate. (3) Retention distance of Echinomycin,  $\gamma$ CD and Echinomycin-  $\gamma$ CD. (4) "in situ" Echinomycin-in- $\gamma$ CD mixture under UV light. (5) "in situ" Echinomycin-in- $\gamma$ CD mixture after heating silica plate. (6) "in situ" retention of echinomycin and  $\gamma$ CD.

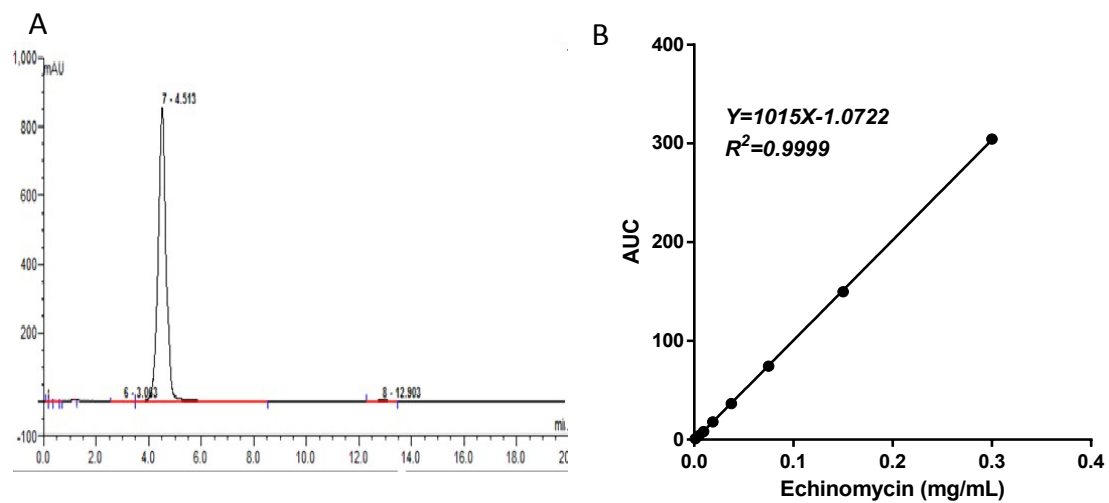

**Fig. S2:** (A) Representative HPLC chromatography peak of echinomyacin samples. (B) Calibration curve of echinomyacin standard samples.
